# Supplementary material for: Ubiquitination screen using protein microarrays for comprehensive identification of Rsp5 substrates in yeast
Source: PubMed Central journal article supplement — Mol Syst Biol. 2007 Jun 5;3:116. doi: 10.1038/msb4100159 (PMC1911201; doi:10.1038/msb4100159), 2007-06-05
Supplement: msb4100159-s1.pdf [file msb4100159-s1.pdf]

**MSB-07-381, REVISED**

**SUPPLEMENTARY MATERIAL**

**Ubiquitination Screen Using Protein Microarrays for Comprehensive Identification of Rsp5 Substrates in Yeast**

Ronish Gupta<sup>1,2\*</sup>, Bart Kus<sup>1,2\*</sup>, Christopher Fladd<sup>1,2</sup>, James Wasmuth<sup>3</sup>, Raffi Tonikian<sup>4,5</sup>, Nevan J. Krogan<sup>6</sup>, Charlie Boone<sup>4,5</sup>, John Parkinson<sup>2,3,5</sup> and Daniela Rotin<sup>1,2#</sup>

**Supplementary Figure S1. Sequence logos for selected yeast strains.**

A. The PY ((L/P)PxY) motifs from Rsp5 substrate homologues in different yeast strains were aligned. The results from 6 yeast strains are displayed as sequence Logos.

B. Extent of purifying selection of the (L/P)PxY motif. The ratio of non-synonymous and synonymous change (Ka/Ks) was calculated from nucleotide alignments for each group of yeast orthologues. This graph shows the mean ratio across 46 groups, with focus on the (L/P)PxY motif. Lower Ka/Ks ratios are indicative of purifying selection; a desire to prevent nucleotide mutation that changes the encoded for amino acid.

C. Homologues of Rsp5 substrates from different strains were aligned. The table lists the related yeast strains, the most (1<sup>st</sup>) preferred residues and the 2<sup>nd</sup> most preferred residues at the x position of the (L/P)PxY motifs of the Rsp5 substrate homologues.

Supplementary Figure S1.

A.

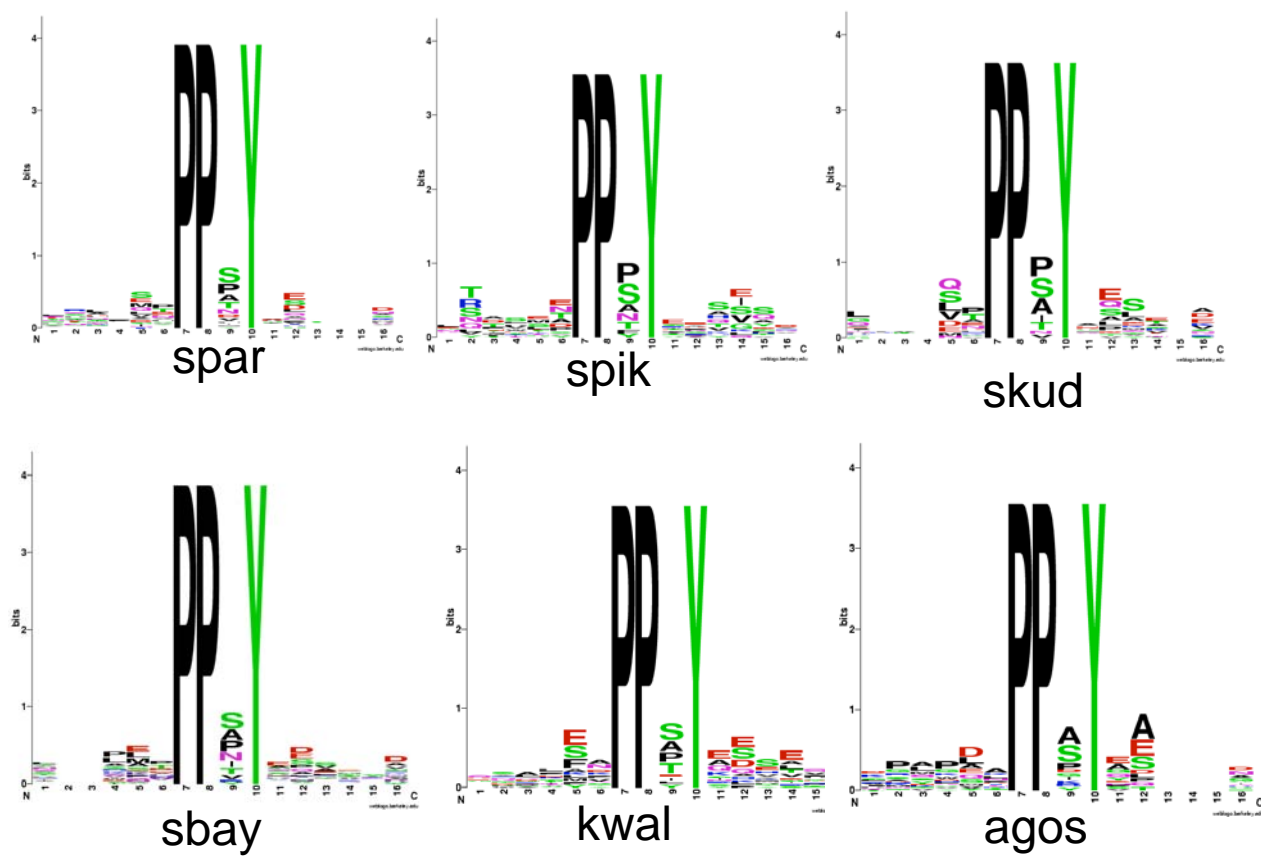

B.

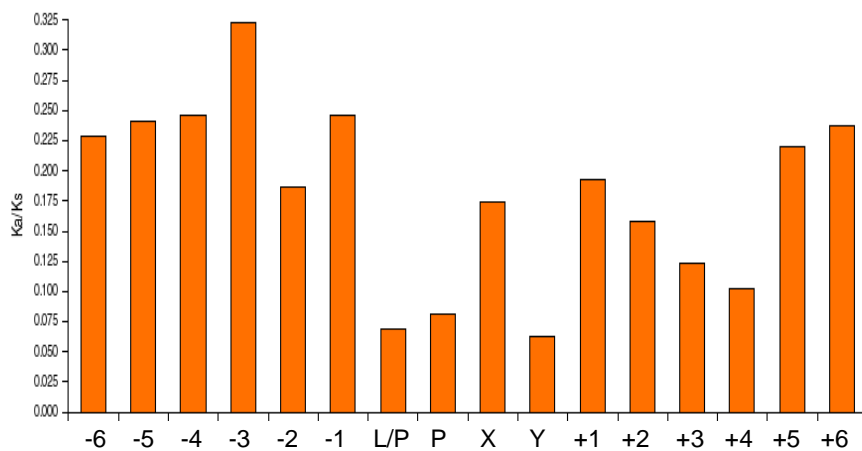

C.

Preferred residues at 3<sup>rd</sup> position

|      | 1st | 2nd |
|------|-----|-----|
| Ylip | A   | T   |
| Spo  | S   | A   |
| Spar | S   | P   |
| Smik | S   | P   |
| Skud | S   | P   |
| Sklu | S   | P   |
| Scer | S   | P   |
| Scas | S   | A   |
| Sbay | S   | A   |
| ncra | S   | Q   |
| Kwal | S   | A   |
| Klac | S   | A   |
| fgra | A   | P   |
| Dhan | A   | S   |
| Ctro | S   | A   |
| Cgla | S   | A   |
| anid | P   | S   |
| agos | A   | S   |
